# Supplementary material for: Aluminum-Doping Effects on the Electronic States of Graphene Nanoflake: Diffusion and Hydrogen Storage Mechanism
Source: MDPI journal article supplement (doi:10.3390/nano13142046), 2023-07-11
Supplement: s1 [file s1]

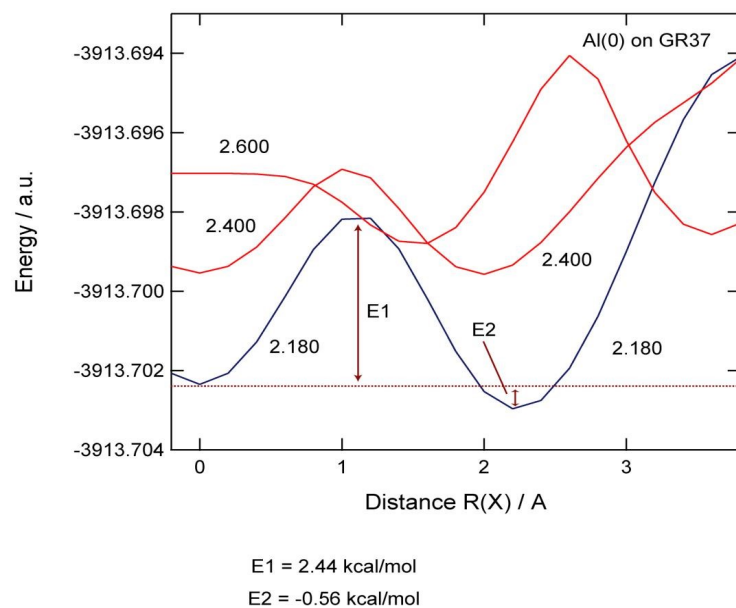

**Figure S1.** Potential energy curve (PECs) for the diffusion of Al on GR37 surface (x-axis direction). The values mean height of Al from GR ( $h$  in Å).

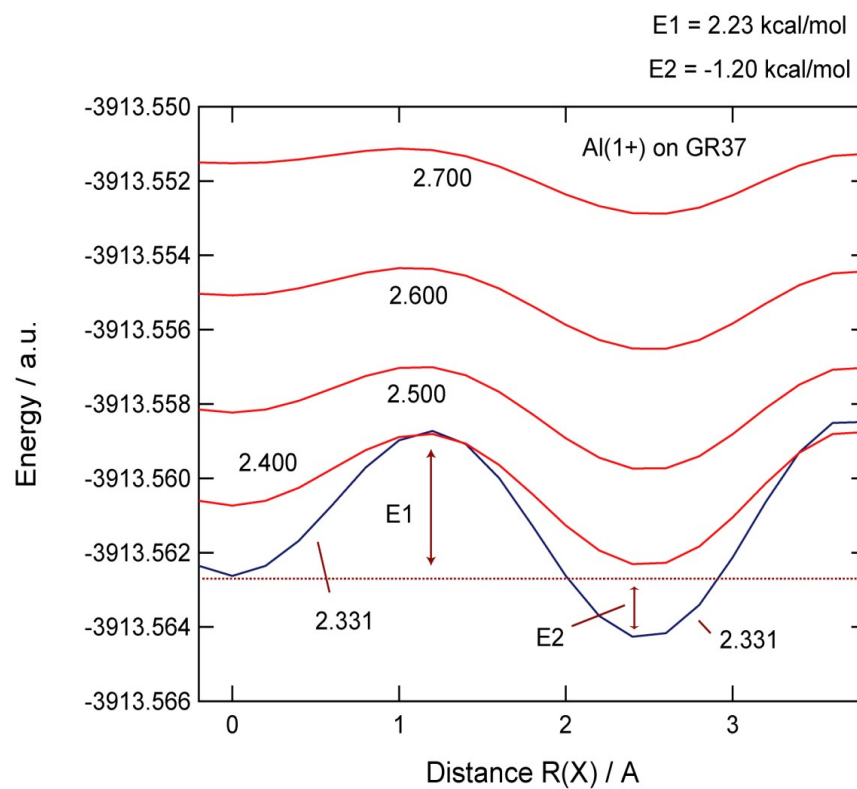

**Figure S2.** Potential energy curve (PECs) for the diffusion of  $\text{Al}^3$  on GR37 surface (x-axis direction). The values mean height of Al from GR ( $h$  in Å).

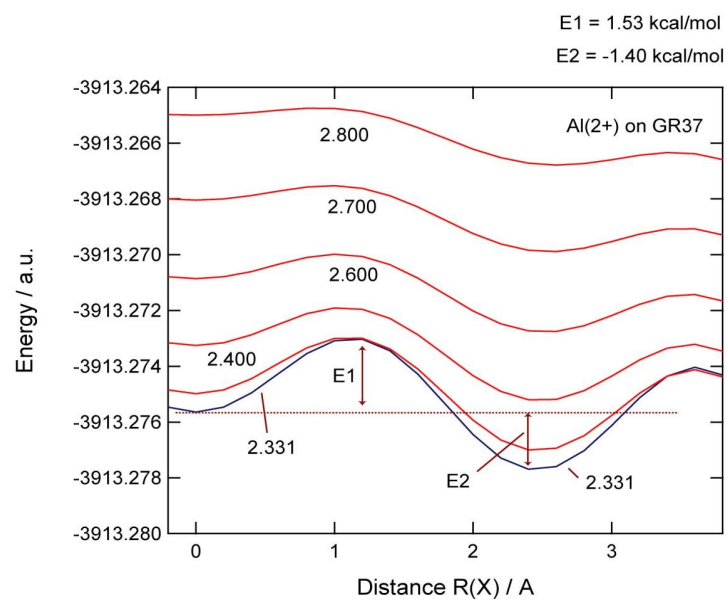

**Figure S3.** Potential energy curve (PECs) for the diffusion of  $\text{Al}^{2+}$  on GR37 surface (x-axis direction). The values mean height of Al from GR ( $h$  in Å). .
